# Supplementary material for: A nanoscale porous glucose-based polymer for gas adsorption and drug delivery
Source: Royal Society of Chemistry journal article supplement (doi:10.1039/c8nj03160f), 2018-01-01
Supplement: c8nj03160f1.pdf [file c8nj03160f1.pdf]

## **Nanoscale porous glucose-based polymer for gas adsorption and drug delivery**

Xiaowei Jiang,<sup>†</sup> Qiuliang Wang,<sup>†</sup> Yunfei Liu, Xiaohui Fu, Yali Luo\* and Yinong Lyu\*

*State Key Laboratory of Materials-Oriented Chemical Engineering, College of Materials  
Science and Engineering, Nanjing Tech University, Nanjing 210009, P. R. China*

Tel: +86 25 83172114; Email: [luoyali@njtech.edu.cn](mailto:luoyali@njtech.edu.cn)

Tel: +86 25 83172118; Email: [yinonglu@njtech.edu.cn](mailto:yinonglu@njtech.edu.cn)

Table of content:

Fig. S1 FT-IR spectrum of glu-NOP.

Fig. S2 SEM image of glu-NOP.

Fig. S3 Powder X-ray diffraction of glu-NOP.

Fig. S4 TGA plots of glu-NOP under nitrogen atmosphere.

Fig. S5 Initial slope fitting at 273 K for glu-NOP.

Fig. S6 In vitro biocompatibility of glu-NOP against HeLa cells at different concentrations for 24 h.

Fig. S7 Diagram of adsorption of IBU.

Fig. S8 Diagram of adsorption of 5-FU.

TABLE S1 Comparison of surface area, CO<sub>2</sub> uptake, and isosteric heat ( $Q_{st}$ ) in selected NOPs with –OH functional groups.

TABLE S2 Porosity and CO<sub>2</sub> capacities of samples

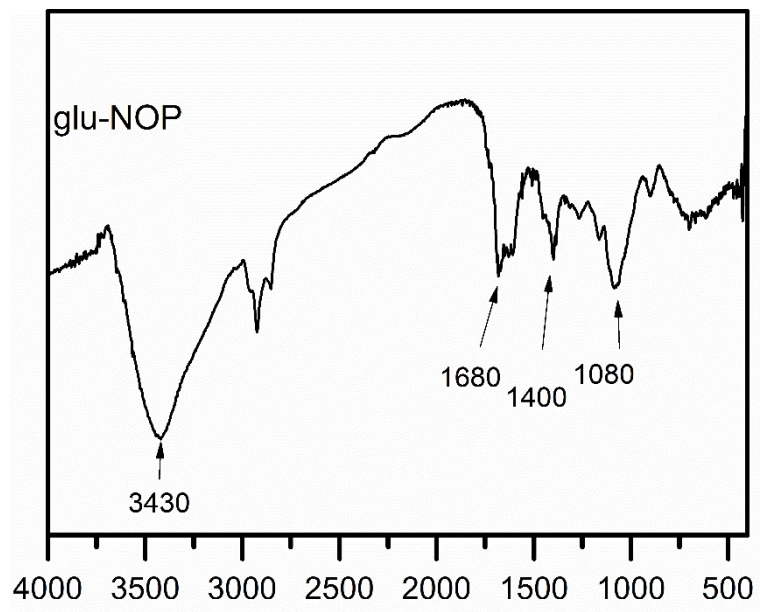

Fig. S1 FTIR spectrum of glu-NOP.

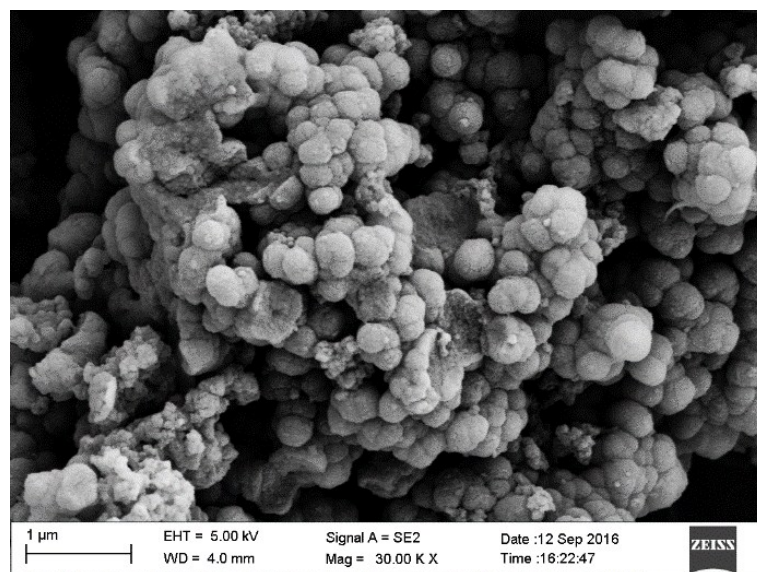

Fig. S2 SEM image of glu-NOP.

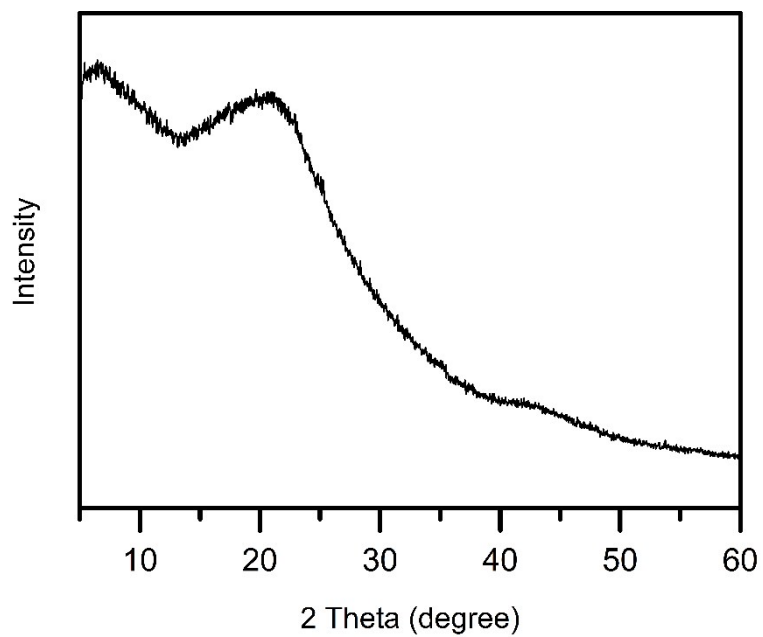

Fig. S3 Powder X-ray diffraction of glu-NOP.

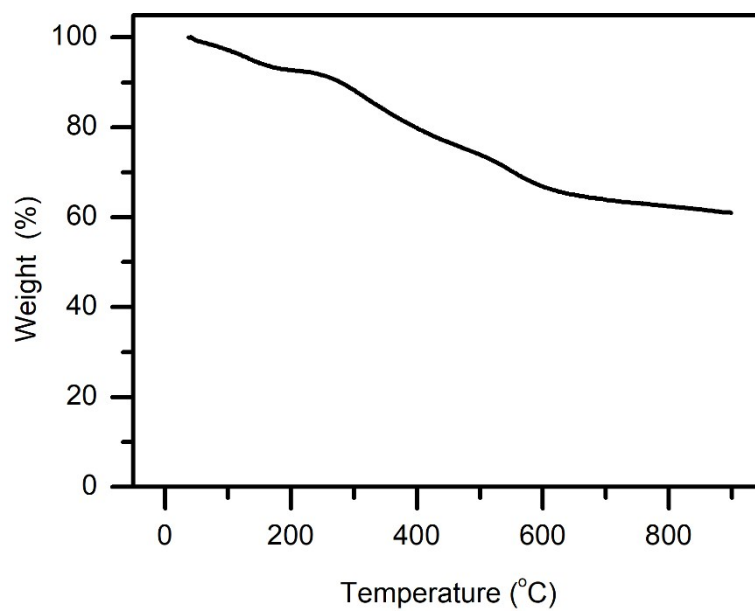

Fig. S4 TGA plots of glu-NOP under nitrogen atmosphere.

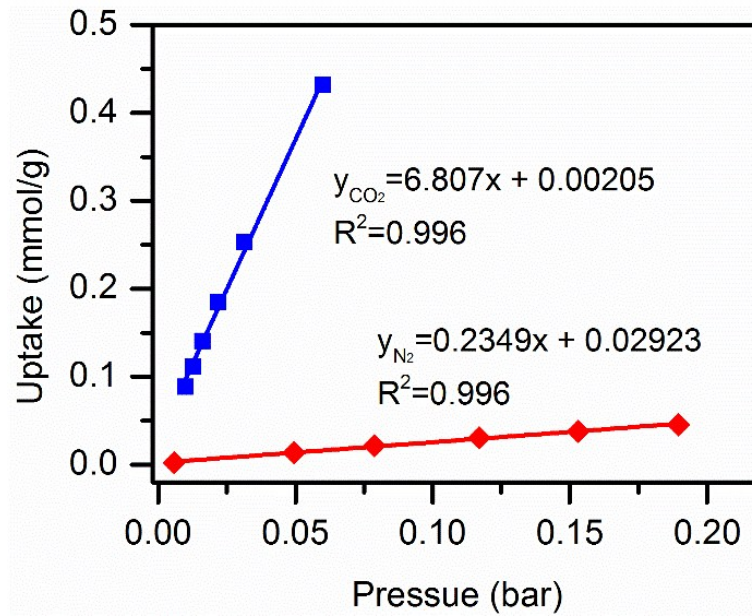

Fig. S5 Initial slope fitting at 273 K for glu-NOP.

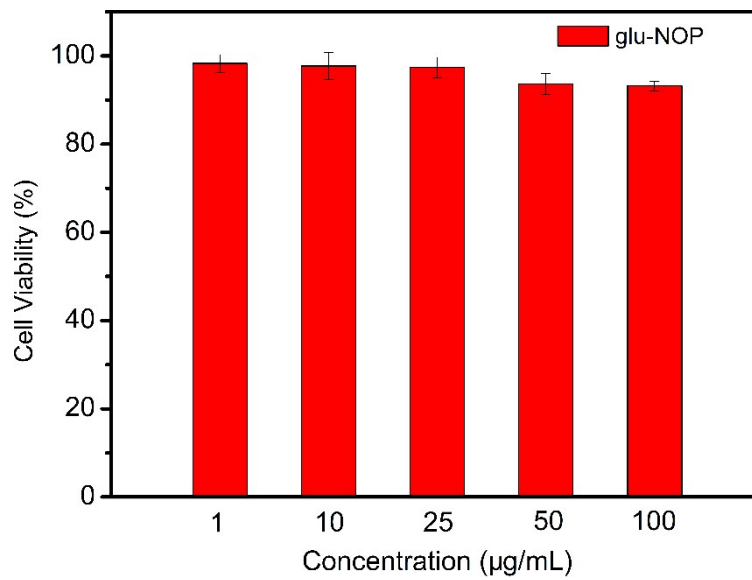

Fig. S6 In vitro biocompatibility of glu-NOP against HeLa cells at different concentrations for 24 h.

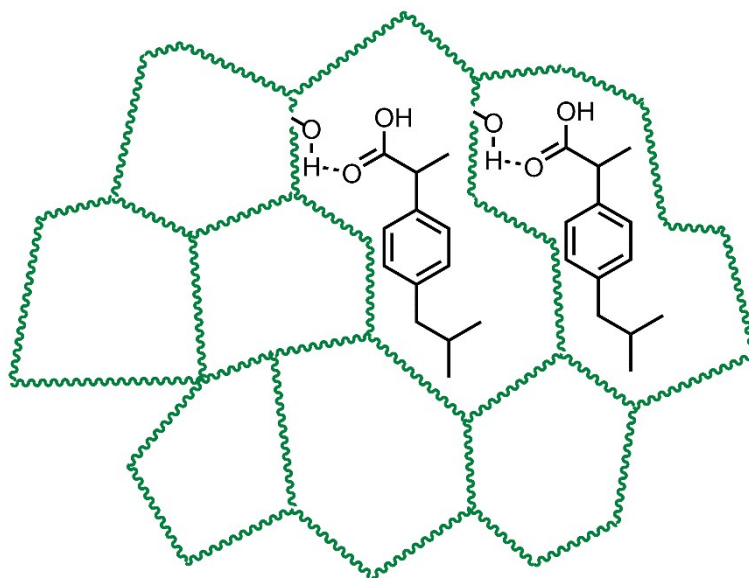

Fig. S7 Diagram of adsorption of IBU.

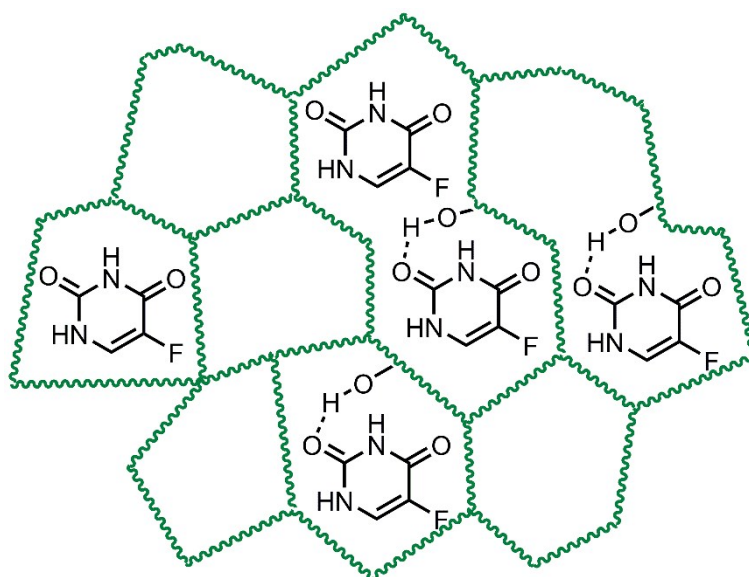

Fig. S8 Diagram of adsorption of 5-FU.

Table S1 Comparison of surface area, CO<sub>2</sub> uptake, and isosteric heat (Q<sub>st</sub>) in selected NOPs with – OH functional groups.

|                             | S <sub>BET</sub><br>(m <sup>2</sup> g <sup>-1</sup> ) | CO <sub>2</sub> uptake<br>(mmol g <sup>-1</sup> ) | T<br>(K) | Q <sub>st</sub><br>(kJ mol <sup>-1</sup> ) | Ref       |
|-----------------------------|-------------------------------------------------------|---------------------------------------------------|----------|--------------------------------------------|-----------|
| glu-NOP                     | 682                                                   | 2.84                                              | 273      | 23-25                                      | This work |
|                             |                                                       | 1.71                                              | 298      |                                            |           |
| Glc-3                       | 829                                                   | 2.43                                              | 273      | 25.8                                       | 1         |
|                             |                                                       | 1.45                                              | 298      |                                            |           |
| 1-naphthol                  | 414                                                   | 1.85                                              | 273      | 28-31                                      | 2         |
|                             |                                                       | 1.25                                              | 298      |                                            |           |
| phenol                      | 400                                                   | 2.14                                              | 273      | 28-31                                      | 3         |
| Tetraphenylethylene-<br>HCP | 618                                                   | 1.92                                              | 273      | -                                          | 4         |
|                             |                                                       | 1.12                                              | 298      |                                            |           |

Table S2 Porosity and CO<sub>2</sub> capacities of samples

|         | S <sub>micro</sub><br>(m <sup>2</sup> g <sup>-1</sup> ) | V <sub>total</sub><br>(cm <sup>3</sup> g <sup>-1</sup> ) | V <sub>micro</sub><br>(cm <sup>3</sup> g <sup>-1</sup> ) | S <sub>micro</sub> /S <sub>BET</sub> | V <sub>micro</sub> /V <sub>total</sub> | Ref       |
|---------|---------------------------------------------------------|----------------------------------------------------------|----------------------------------------------------------|--------------------------------------|----------------------------------------|-----------|
| glu-NOP | 451                                                     | 0.39                                                     | 0.18                                                     | 66.1 %                               | 46 %                                   | This work |
| Glc-3   | 479                                                     | 0.47                                                     | 0.22                                                     | 57.7 %                               | 46 %                                   | 1         |

#### References

1. H. Li, B. Meng, S. M. Mahurin, S.-H. Chai, K. M. Nelson, D. C. Baker, H. Liu and S. Dai, *J. Mater. Chem. A*, 2015, **3**, 20913-20918.
2. R. Dawson, L. A. Stevens, T. C. Drage, C. E. Snape, M. W. Smith, D. J. Adams and A. I. Cooper, *J. Am. Chem. Soc.*, 2012, **134**, 10741-10744.
3. B. Li, R. Gong, W. Wang, X. Huang, W. Zhang, H. Li, C. Hu and B. Tan, *Macromolecules*, 2011, **44**, 2410-2414.
4. S. W. Yao, X. Yang, M. Yu, Y. H. Zhang and J. X. Jiang, *J. Mater. Chem. A*, 2014, **2**, 8054-8059.
